# Supplementary material for: An electrode design rule for high performance top-illuminated organic photovoltaics
Source: Royal Society of Chemistry journal article supplement (doi:10.1039/c6mh00124f), 2016-01-01
Supplement: c6mh00124f1.pdf [file c6mh00124f1.pdf]

## Supplementary Information

DOI:

### An electrode design rule for top-illuminated organic photovoltaics

Martin S. Tyler<sup>1</sup>, Immad I. Nadeem<sup>1,2</sup> and Ross A. Hatton<sup>1</sup>

<sup>1</sup>Department of Chemistry, University of Warwick, CV4 7AL, UK.

<sup>2</sup>Current address: London Centre for Nanotechnology and Department of Chemistry, University College London, 20 Gordon Street, London, WC1H 0AJ, United Kingdom.; Diamond Light Source Ltd, Harwell Science and Innovation Campus, Didcot, Oxfordshire, OX11 0DE, United Kingdom.

E-mail: Ross.Hatton@warwick.ac.uk

### Method for calculating HOMO and LUMO levels:

To calculate the HOMO and LUMO levels from differential pulsed voltammetry the equations shown below were applied to the measured oxidation and reduction potentials to give the HOMO and LUMO respectively:

$$HOMO = -1.2 \times \left( 1^{st} \text{ Oxidation } E_{\frac{1}{2} \text{ Material}} - E_{\frac{1}{2} \text{ Ferrocene}} \right) - 4.8$$

$$LUMO = -1.2 \times \left( 1^{st} \text{ Reduction } E_{\frac{1}{2} \text{ Material}} - E_{\frac{1}{2} \text{ Ferrocene}} \right) - 4.8$$

| Material            | HOMO/ eV | LUMO/ eV |
|---------------------|----------|----------|
| PC <sub>60</sub> BM | -6.16    | -3.78    |
| PC <sub>70</sub> BM | -6.05    | -3.77    |

For both PC<sub>60</sub>BM and PC<sub>70</sub>BM the measured values are within the range reported in the literature using other measurement techniques.<sup>1-10</sup>

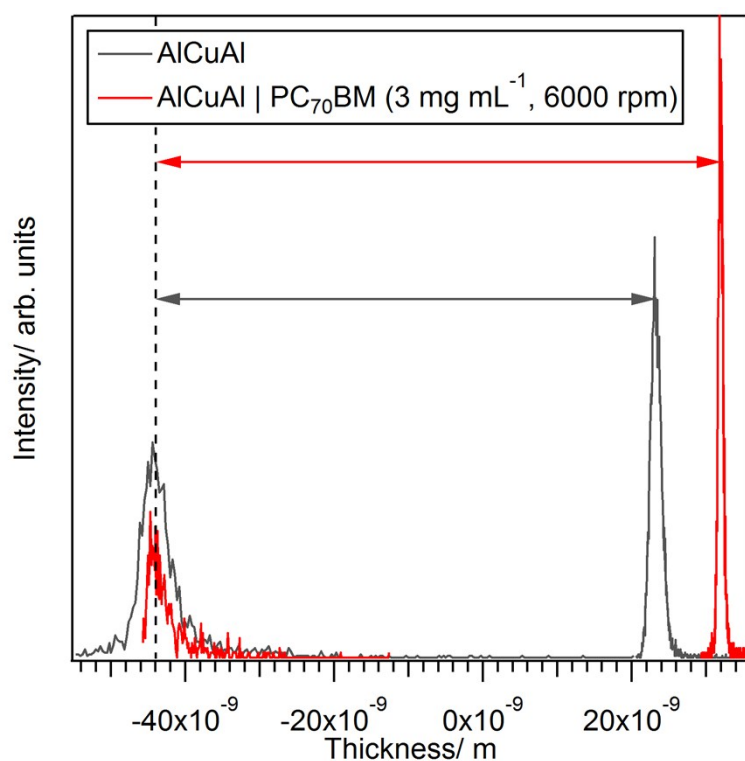

**Figure S1:** Step heights of AlCuAl and AlCuAl | PC<sub>70</sub>BM films measured using atomic force microscopy, showing how the organic semiconductor film thickness was determined. In this case the PC<sub>70</sub>BM solution concentration was 3 mg mL<sup>-1</sup>, the spin speed was 6000 rpm and the film thickness was determined to be ~ 9 nm.

## References

1. Davis *et al.*, *J. Mater. Chem.*, 2011, **21**, 1721.
2. Scharber *et al.* *Adv. Mater.*, 2006, **18**(6), 789.
3. Yoo *et al.*, *Nanoscale. Res. Lett.*, 2011, **6**, 545.
4. Guan *et al.*, *Org. Electron.*, 2010, **11**(11), 1779.
5. Petoukhoff *et al.*, *Sol. Energ. Mat. Sol. Cells*, 2014, **120**, 72.
6. Thompson *et al.*, *Angew. Chem. Int. Ed.* 2007, **47**(1), 58.
7. Ratcliff *et al.*, *Org. Electron.* 2012, **13**(5), 744.
8. He *et al.*, *Chem. Commun.*, 2012, **48**, 7616.
9. Singh *et al.*, *Adv. Func. Mater.*, 2012, **22**(19), 4087.
10. Dou *et al.*, *Nature Photonics*, 2012, **6**, 180.
